# Supplementary material
Source: PubMed Central journal article supplement (PMC3317555)
Supplement: cr2011172x1.pdf [file cr2011172x1.pdf]

## Supplementary information, Figure S1

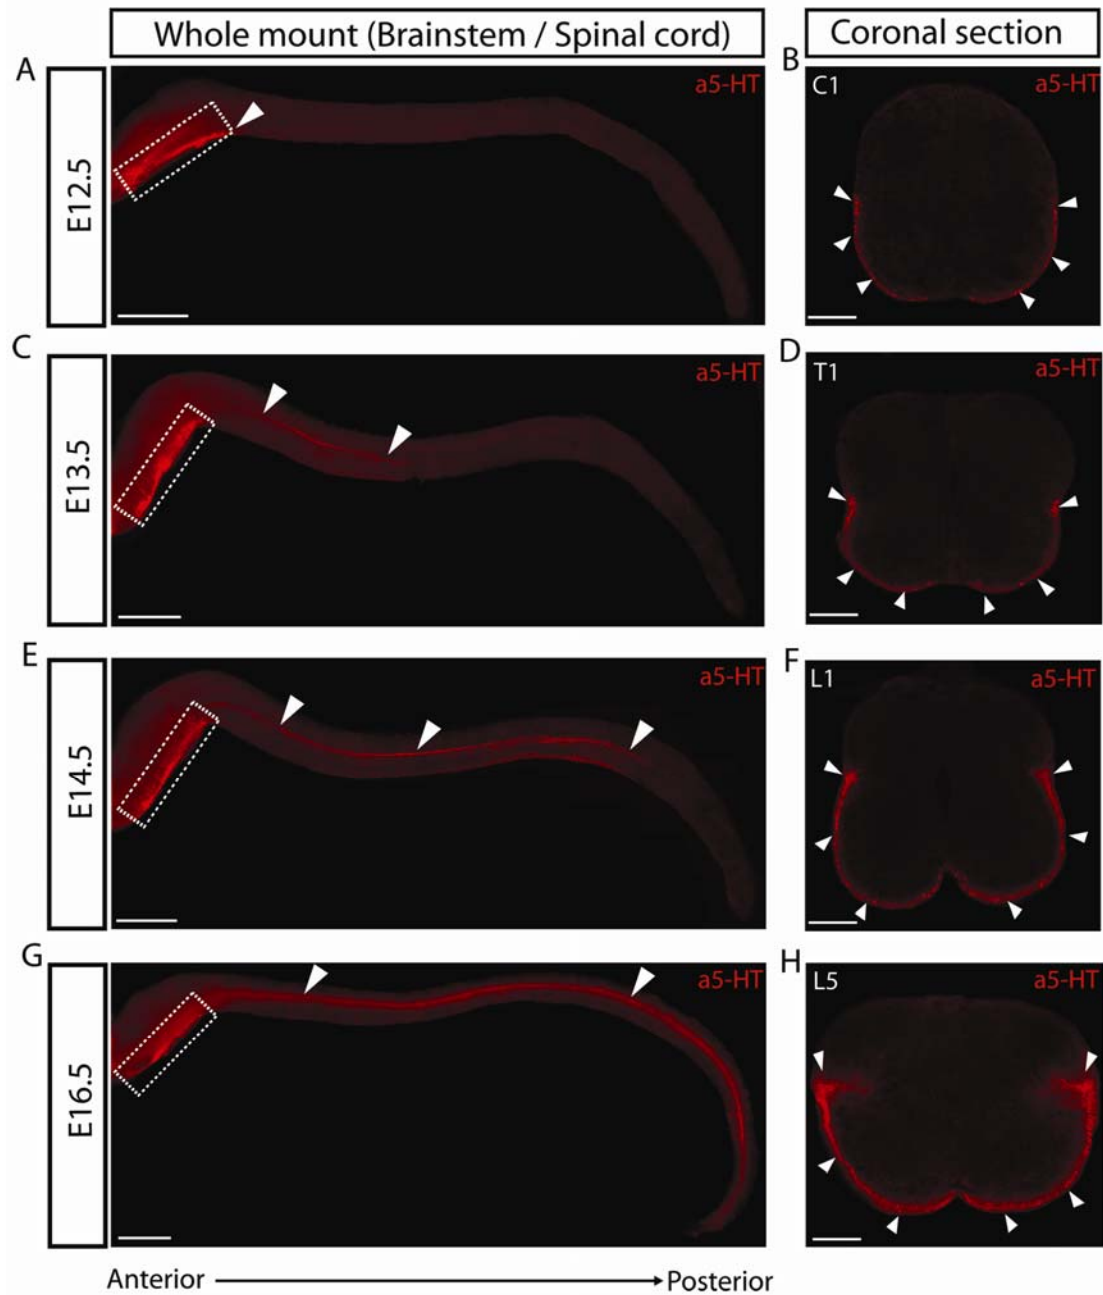

**Figure S1** Serotonergic RST axons descend through the ventral spinal cord from E12.5 through E16.5. Immunostaining with anti-5-HT was applied to whole mounts and coronal sections to label specifically the serotonergic RST axons in the developing spinal cord. **(A)** Serotonergic RST axons originated from the E12.5 CRN. Pioneer axons of descending serotonergic RST began projecting into the spinal cord at E12.5. Scale bar: 1 000  $\mu$ m. **(B)** Descending serotonergic RST axons projected into

the upper cervical segment of the E12.5 spinal cord, through the ventral and ventral lateral funiculus. Scale bar: 200  $\mu\text{m}$ . **(C)** Descending serotonergic RST axons reached the thoracic spinal cord at E13.5. Scale bar: 1 000  $\mu\text{m}$ . **(D)** Descending serotonergic RST axons were localized in the ventral and ventral lateral funiculus of E13.5 thoracic spinal cords. Scale bar: 200  $\mu\text{m}$ . **(E)** Descending serotonergic RST axons projected into the lumbar spinal cord at E14.5. Scale bar: 1 000  $\mu\text{m}$ . **(F)** Descending serotonergic RST axons were localized in the ventral and ventral lateral funiculus of E14.5 upper lumbar spinal cords. Scale bar: 200  $\mu\text{m}$ . **(G)** Descending serotonergic RST axons projected to the sacral spinal cord at E16.5. Scale bar: 1 000  $\mu\text{m}$ . **(H)** Major bundles of descending serotonergic RST axons remained localized in the ventral and ventral lateral funiculus of E16.5 lumbar spinal cords. Scale bar: 200  $\mu\text{m}$ . Rectangles outline the brainstem region containing serotonergic CRN. White arrowheads point to descending serotonergic RST axons.
