# Supplementary material
Source: PubMed Central journal article supplement (PMC3317555)
Supplement: cr2011172x2.pdf [file cr2011172x2.pdf]

## Supplementary information, Figure S2

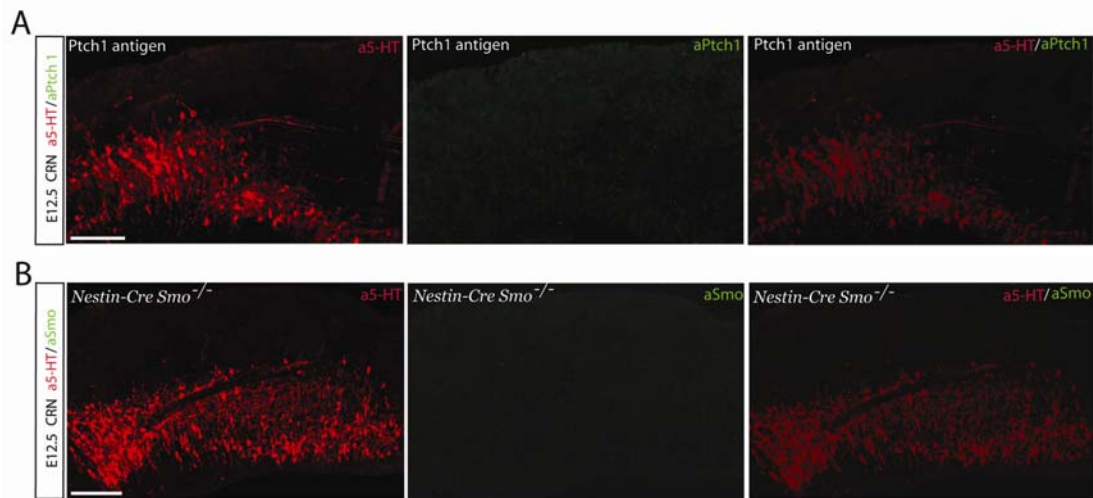

**Figure S2** Specificity of Ptch1 and Smo immunostaining in serotonergic neurons of the CRN. Sagittal sections from the brainstem that contained serotonergic neurons of the CRN were cryosectioned and used for co-immunostaining for Smo and 5-HT or Ptch1 and 5-HT. **(A)** The immunoreactive signal for anti-Ptch 1 staining was eliminated by preincubation of Ptch 1 and 5-HT antibodies with purified recombinant Ptch 1 (purified antigen). **(B)** Smo immunoreactivity was not detected on tissue from a *Nestin-Cre; Smo<sup>-/-</sup>* mouse. Scale bar: 100  $\mu$ m.
