# Supplementary material
Source: PubMed Central journal article supplement (PMC3317555)
Supplement: cr2011172x3.pdf [file cr2011172x3.pdf]

## Supplementary information, Figure S3

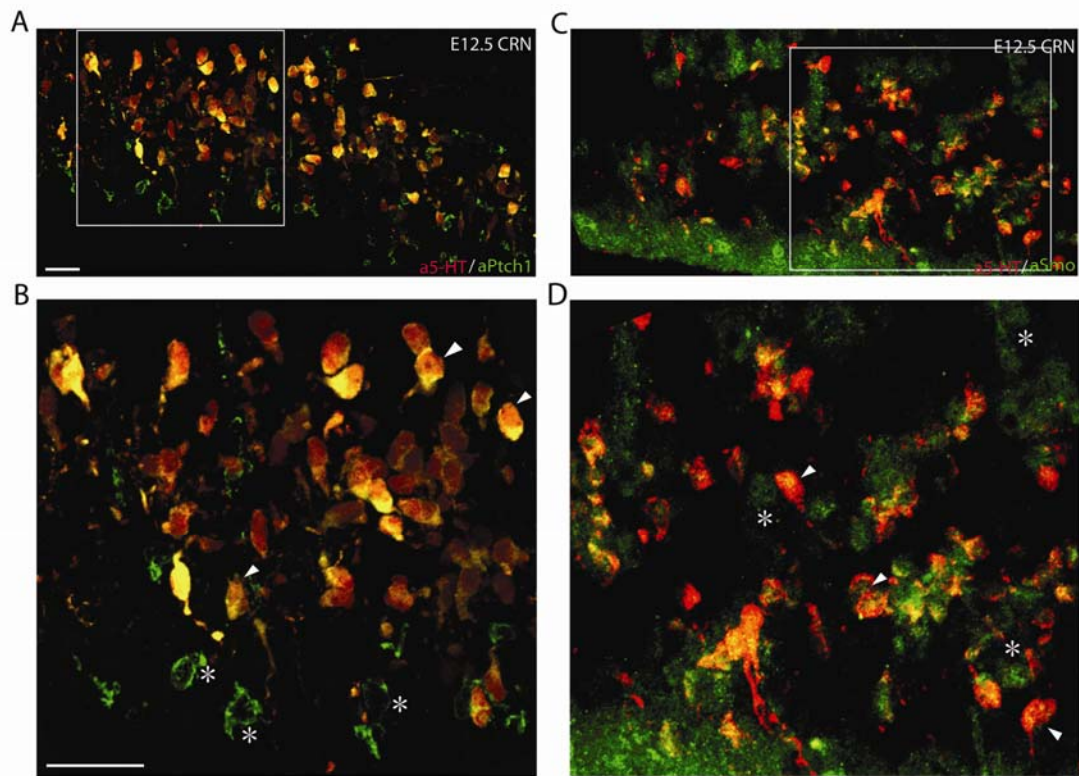

**Figure S3** Ptch1 and Smo expression in E12.5 serotonergic CRN neurons is shown in high-magnification images. At stage E12.5, Ptch1 (A) and Smo (C) were expressed in the serotonergic CRN neurons. High-magnification images of selected areas are shown in insets (B, D). White arrowheads indicate CRN neurons stained with anti-5-HT and anti-Ptch 1 or anti-5-HT and anti-Smo. Asterisks mark neurons stained with only Ptch 1 or Smo. Scale bar: 100  $\mu$ m.
