# Supplementary material
Source: PubMed Central journal article supplement (PMC3317555)
Supplement: cr2011172x5.pdf [file cr2011172x5.pdf]

## Supplementary information, Figure S5

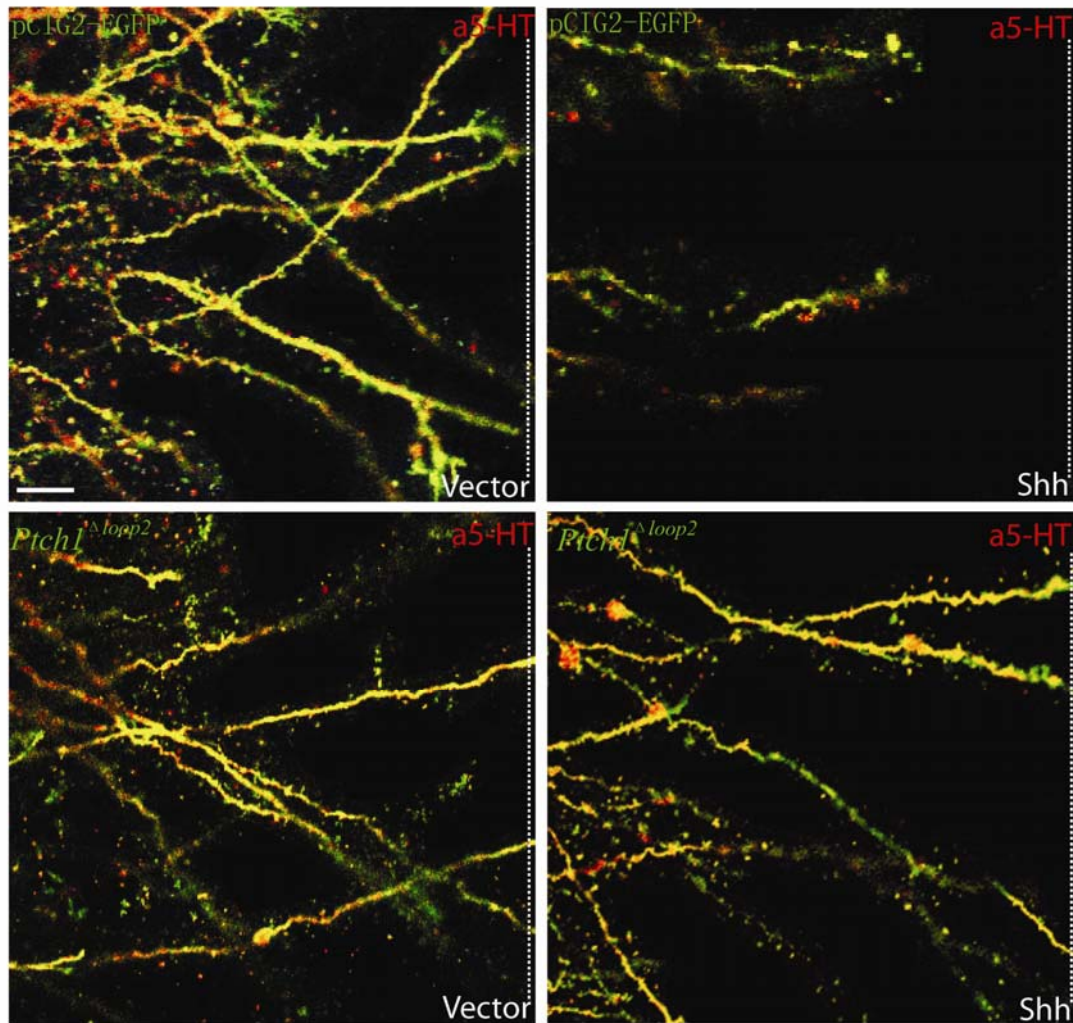

**Figure S5** Co-immunostaining for EGFP and 5-HT in the cell aggregate assay is shown in high-magnification images. In the cell aggregate assay (Figure 3C), co-immunostaining for EGFP and 5-HT was conducted to show *Ptch1* <sup>$\Delta$ loop2</sup> expression in serotonergic RST axons. The EGFP- and 5-HT-immunoreactive axons in different groups are shown in high-magnification images. Dotted lines show the cell aggregates. Scale bar: 200  $\mu$ m.
