# Supplementary material
Source: PubMed Central journal article supplement (PMC3317555)
Supplement: cr2011172x6.pdf [file cr2011172x6.pdf]

## Supplementary information, Figure S6

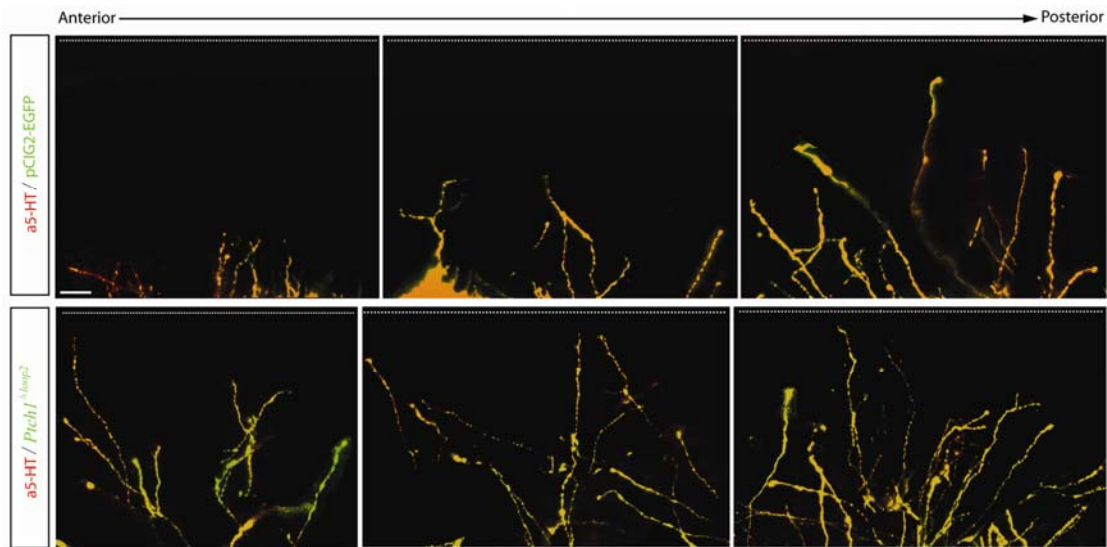

**Figure S6** Co-immunostaining for EGFP and 5-HT in the A-P graded assay is shown in high-magnification images. In the A-P graded assay (Figure 4B), EGFP and 5-HT co-immunostaining was conducted to show *Ptch1*<sup>Aloop2</sup> expression in serotonergic RST axons. The EGFP- and 5-HT-immunoreactive axons in different groups are shown in high-magnification images. Dotted lines show the ventral spinal cords. Scale bar: 200  $\mu\text{m}$ .
