# Supplementary material
Source: PubMed Central journal article supplement (PMC3317555)
Supplement: cr2011172x7.pdf [file cr2011172x7.pdf]

## Supplementary information, Figure S7

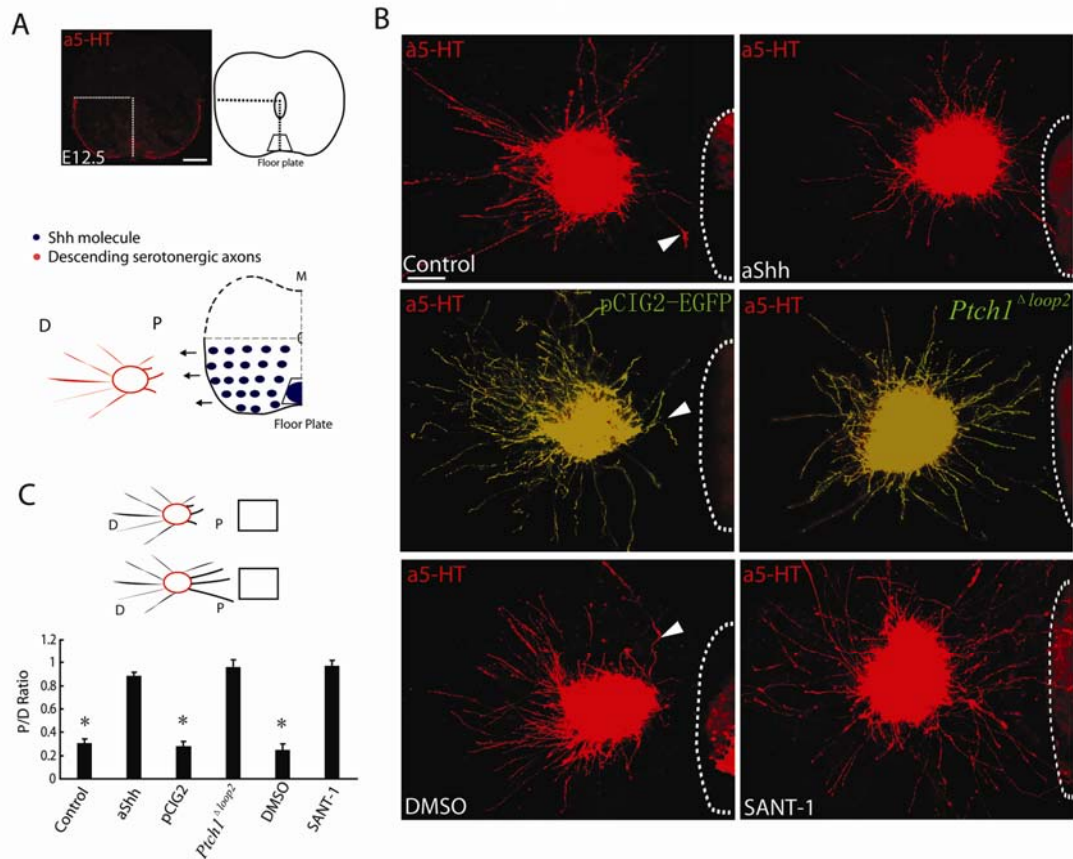

**Figure S7** M-L repulsion is mediated by Shh signaling. **(A)** The M-L co-culture assay procedure. The region of the ventral spinal cord with descending serotonergic RST axons was revealed by 5-HT immunostaining of coronal sections of the E12.5 upper cervical spinal cord (outlined by the dashed line). Scale bar: 200  $\mu$ m. E12.5 CRN explants and slices of the ventral spinal cord were dissected and co-cultured in the M-L functional assay. In the *ex utero* electroporation procedure, the *Ptch1<sup>Aloop2</sup>* construct was electroporated into the CRN of E12.5 embryos before dissection. After culturing, 5-HT immunostaining was conducted to confirm that serotonergic RST axons were growing from the CRN explants. **(B)** E12.5 ventral spinal cords repelled the serotonergic RST axons from the CRN explants. This repulsion was effectively eliminated when the Shh antibody (5E1) or SANT-1 were added to the co-culture system or when *Ptch1<sup>Aloop2</sup>* was expressed in serotonergic RST axons by co-culturing *Ptch1<sup>Aloop2</sup>*-electroporated CRN with ventral spinal cords. White arrowheads indicate deflected axons. White dashed lines outline the boundary of ventral spinal cords.

Scale bar: 200  $\mu\text{m}$ . (C) Quantification of axon outgrowth. Repulsion was measured using the P/D ratio. Blocking the Shh signaling components effectively abolished ventral spinal cord repulsion of serotonergic RST axons. The experiment was replicated at least five times. Statistical analysis was performed using the Student's *t*-test. Results are presented as the mean  $\pm$  S.E.M. Control group:  $0.298 \pm 0.044$ ; Shh Antibody group:  $0.878 \pm 0.039$ ; pCIG2-EGFP group:  $0.275 \pm 0.049$ ; *Ptch1*<sup>*Δloop2*</sup> group:  $0.952 \pm 0.073$ ; DMSO group:  $0.241 \pm 0.060$ ; SANT-1 group:  $0.962 \pm 0.058$ . Asterisks indicate values that differed significantly from the values of the control groups ( $P < 0.05$ ).
