# Supplementary material
Source: PubMed Central journal article supplement (PMC3317555)
Supplement: cr2011172x8.pdf [file cr2011172x8.pdf]

## Supplementary information, Figure S8

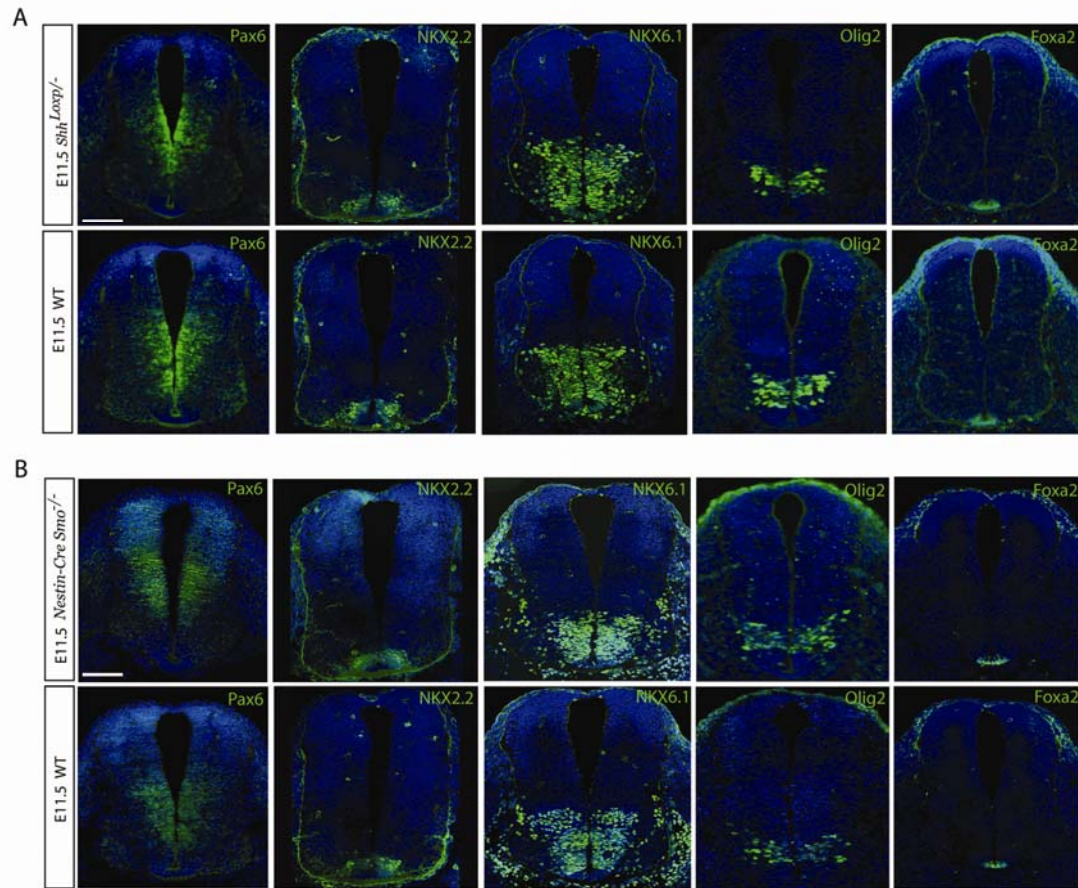

**Figure S8** Patterning of the spinal cord is not affected in *Shh<sup>loxp/-</sup>* hypomorphic mice or *Nestin-Cre; Smo<sup>-/-</sup>* mice. **(A)** E11.5 spinal cords of *Shh<sup>loxp/-</sup>* and WT mice were cut into coronal sections, and immunostaining for Pax 6, NKX2.2, NKX6.1, Olig2 and Foxa2 was conducted to analyze the patterning of the spinal cord. **(B)** E11.5 spinal cords of *Nestin-Cre; Smo<sup>-/-</sup>* and WT mice were analyzed as in **A**. Abnormal patterning of the spinal cord was not detected in *Nestin-Cre; Smo<sup>-/-</sup>* mice or *Shh<sup>loxp/-</sup>* hypomorphic mice. Scale bars: 200  $\mu$ m.
