# Supplementary material
Source: PubMed Central journal article supplement (PMC3317555)
Supplement: cr2011172x9.pdf [file cr2011172x9.pdf]

## Supplementary information, Figure S9

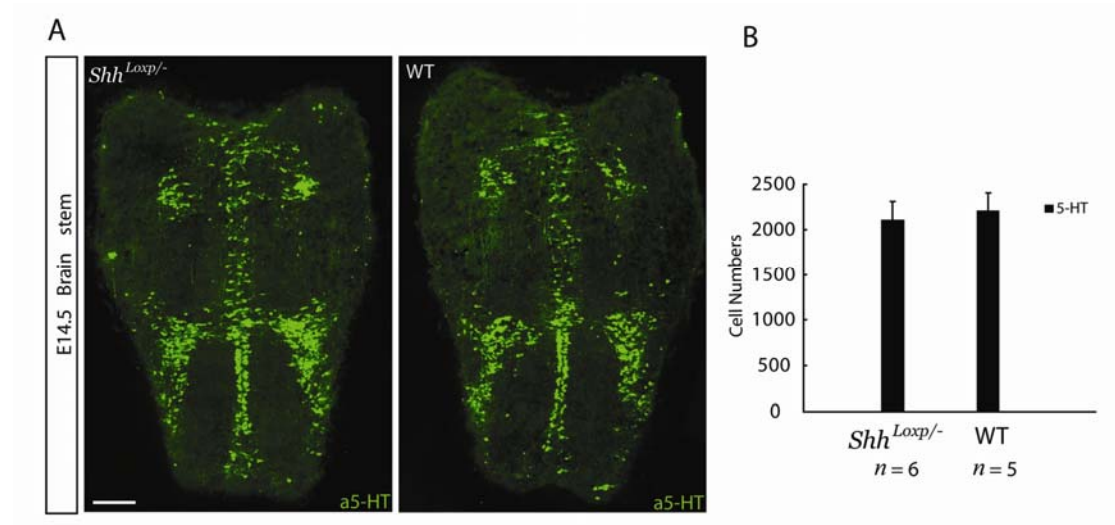

**Figure S9** *Shh<sup>lox/-</sup>* mice do not show a reduction of serotonergic neurons in the brainstem. **(A)** The serotonergic neurons in the E12.5 brainstem were immunostained with anti-5-HT. **(B)** The number of CRN serotonergic neurons in the brainstem of *Shh<sup>lox/-</sup>* and WT mice were quantified. Data are presented as the mean  $\pm$  S.E.M. WT:  $2205 \pm 203$ ; *Shh<sup>lox/-</sup>* mice:  $2098 \pm 216$ ; scale bar: 100  $\mu$ m.
