# Supplementary material
Source: PubMed Central journal article supplement (PMC3317555)
Supplement: cr2011172x10.pdf [file cr2011172x10.pdf]

## Supplementary information, Figure S10

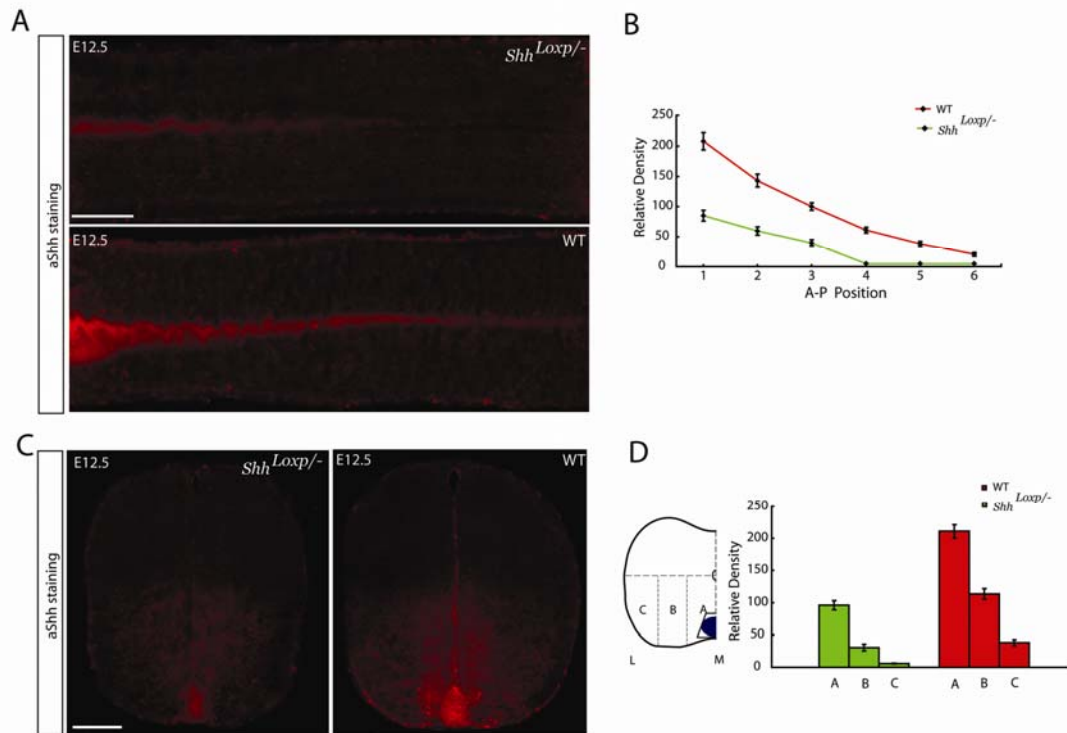

**Figure S10** The graded Shh distribution is altered in E12.5 *Shh<sup>Loxp/-</sup>* spinal cord. **(A)** Immunostaining for Shh showed that the Shh gradient in the A-P direction became shorter and less steep in the spinal cord of E12.5 *Shh<sup>Loxp/-</sup>* mice in comparison with WT mice. Scale bar: 500  $\mu$ m. **(B)** Quantification of positive immunostaining signals for the Shh gradient in the A-P direction in the E12.5 spinal cord of *Shh<sup>Loxp/-</sup>* and WT mice. **(C)** The absolute concentration of Shh expression in the M-L direction was reduced, but the graded Shh distribution in the M-L direction still present, in the spinal cord of *Shh<sup>Loxp/-</sup>* mice in comparison with WT mice. Scale bar: 200  $\mu$ m. **(D)** Quantification of positive immunostaining signals for the Shh gradient in the M-L direction in the E12.5 spinal cord of *Shh<sup>Loxp/-</sup>* and WT mice.
