# Supplementary material
Source: PubMed Central journal article supplement (PMC3317555)
Supplement: cr2011172x11.pdf [file cr2011172x11.pdf]

## Supplementary information, Figure S11

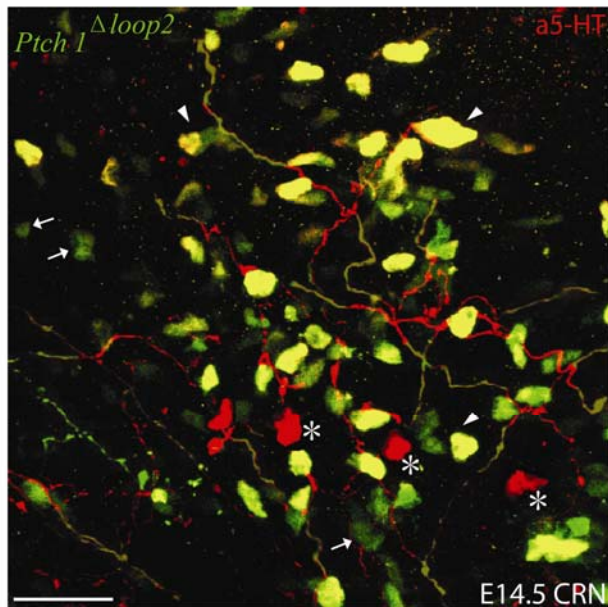

**Figure S11** Co-immunostaining for EGFP and 5-HT in the *Ptch1<sup>Δloop2</sup>*-electroporated CRN is shown in high-magnification images. Co-immunostaining for EGFP and 5-HT was conducted to show *Ptch1<sup>Δloop2</sup>*-EGFP expression in serotonergic neurons and axons in the E14.5 *Ptch1<sup>Δloop2</sup>*-electroporated CRN. The specific expression pattern of 5-HT and EGFP in neurons are shown in high-magnification images. White arrowheads indicate CRN neurons stained with anti-5-HT and anti-GFP. Asterisks mark neurons stained with only anti-5-HT. Arrows indicate neurons stained with only anti-GFP. Scale bar: 50  $\mu\text{m}$ .
