# Supplementary material
Source: PubMed Central journal article supplement (PMC3317555)
Supplement: cr2011172x12.pdf [file cr2011172x12.pdf]

## Supplementary information, Figure S12

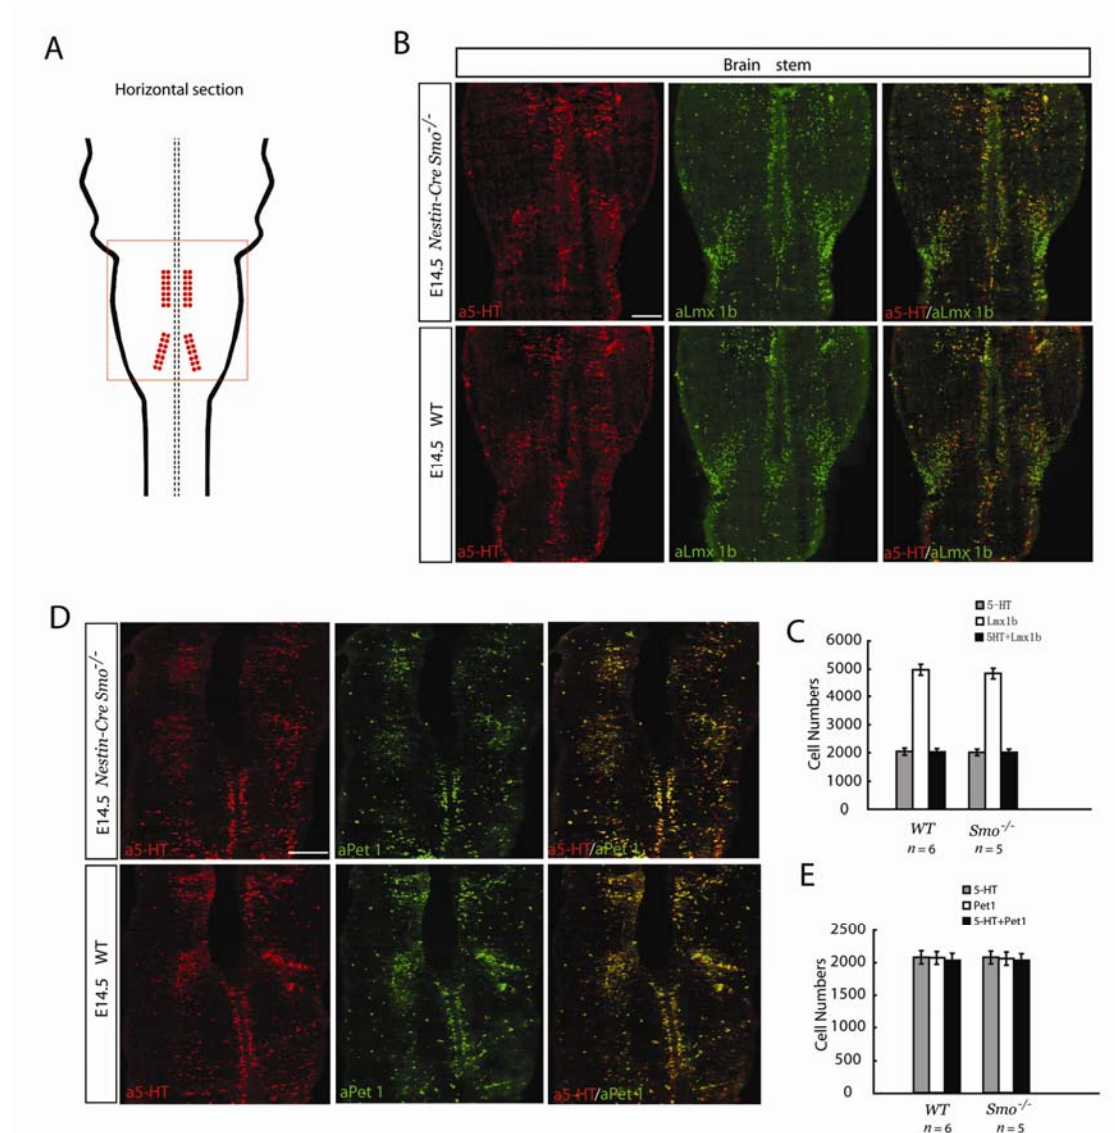

**Figure S12** The development of serotonergic neurons in the brainstem is not altered in *Nestin-Cre; Smo<sup>-/-</sup>* mice. The caudal brainstem containing the CRN (**A**) was cut into horizontal sections (shown in the rectangle), and the serotonergic CRN neurons were co-immunostained for 5-HT and Lmx1b or 5-HT and Pet1. (**B**) The pattern of serotonergic CRN neurons was similar in *Smo*-deficient and WT mice. Lmx1b was expressed normally in the CRN of *Smo*-deficient mice. Scale bar: 100  $\mu$ m. (**C**) Numbers of serotonergic neurons and Lmx1b-expressing serotonergic neurons in the brain stem of *Nestin-Cre; Smo<sup>-/-</sup>* and WT mice. Data are presented as the mean  $\pm$  S.E.M. WT: 5-HT positive: 2041  $\pm$  115; Lmx1b positive: 4955  $\pm$  193; 5-HT+Lmx1b positive: 2035  $\pm$  107. *Nestin-Cre; Smo<sup>-/-</sup>* mice: 5-HT positive: 2020  $\pm$  112; Lmx1b

positive:  $4826 \pm 189$ ; 5-HT+Lmx1b positive:  $2019 \pm 114$ . **(D)** Pet1 was also expressed normally in the CRN of Smo-deficient mice. Scale bar: 100  $\mu\text{m}$ . **(E)** Numbers of serotonergic neurons and Pet1-expressing serotonergic neurons in the brainstem of *Nestin-Cre; Smo<sup>-/-</sup>* and WT mice. Data are presented as the mean  $\pm$  S.E.M. WT: 5-HT positive:  $2075 \pm 103$ ; Pet 1 positive:  $2065 \pm 99$ ; 5-HT+Pet 1 positive:  $2029 \pm 102$ ; *Nestin-Cre; Smo<sup>-/-</sup>* mice: 5-HT positive:  $2070 \pm 97$ ; Pet 1 positive:  $2053 \pm 101$ ; 5-HT+Pet 1 positive:  $2024 \pm 105$ . *n* indicates the total number of embryos quantified.
