# Supplementary material
Source: PubMed Central journal article supplement (PMC3317555)
Supplement: cr2011172x15.pdf [file cr2011172x15.pdf]

## Supplementary information, Figure S15

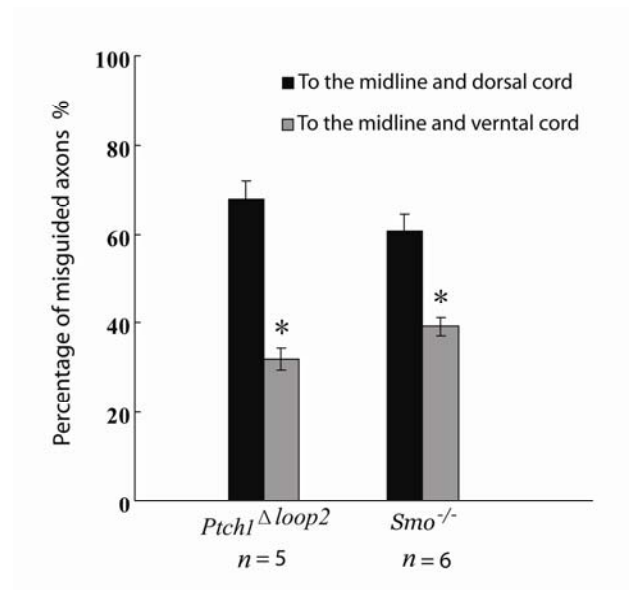

**Figure S15** The position of serotonergic RST axons in the spinal cord of mutant mice was quantified. The percentage of misguided axons in the ventral or dorsal spinal cord is presented as the mean  $\pm$  S.E.M. (%). In mouse embryos electroporated *in utero* with *Ptc1*<sup>Δloop2</sup>, axons were misguided to the midline and dorsal cord (68.02  $\pm$  4.01%) or to the midline and ventral cord (31.98  $\pm$  2.56%). In *Nestin-Cre; Smo*<sup>-/-</sup> mice, axons were misguided to the midline and dorsal cord (60.79  $\pm$  3.75%) or to the midline and ventral cord (39.21  $\pm$  2.07%). Error bars were derived from sets of experiments, and *n* indicates the total number of embryos quantified. Asterisks indicate values that differ significantly from the values of the control groups ( $P < 0.05$ ).
